1  
2  
3  
4  
5  
6  
7  
8  
9  
10  
11  
12  
13  
14  
15  
16  
17  
18  
19  
20  
21

## **Impacts of a millennium drought on butterfly faunal dynamics**

Matthew L. Forister<sup>1\*</sup>, James A. Fordyce<sup>2</sup>, Chris C. Nice<sup>3</sup>, James H. Thorne<sup>4</sup>, David P. Waetjen<sup>4</sup>,  
Arthur M. Shapiro<sup>5</sup>

<sup>1</sup> Department of Biology, Program in Ecology, Evolution and Conservation Biology, University  
of Nevada, Reno, NV 89557, USA

<sup>2</sup> Department of Ecology and Evolutionary Biology, University of Tennessee, Knoxville, TN  
37996, USA

<sup>3</sup> Department of Biology, Population and Conservation Biology Program, Texas State University,  
San Marcos, TX 78666, USA

<sup>4</sup> Department of Environmental Science and Policy, University of California, Davis, CA 95616,  
USA

<sup>5</sup> Center for Population Biology, University of California, Davis, CA 95616, USA

\*Corresponding author. E-mail: [forister@gmail.com](mailto:forister@gmail.com)

21 **Abstract:**

22 Climate change is challenging plants and animals not only with increasing temperatures, but also  
23 with shortened intervals between extreme weather events. Relatively little is known about  
24 diverse assemblages of organisms responding to extreme weather, and even less is known about  
25 landscape and life history properties that might mitigate effects of extreme weather. We find that  
26 northern California butterflies were impacted by a millennium-scale drought differentially at low  
27 and high elevations. At low elevations, phenological shifts facilitated persistence and even  
28 recovery during drought, while at higher elevations a shortened flight season was associated with  
29 decreases in species richness. Phenological and faunal dynamics are predicted by temperature  
30 and precipitation, thus advancing the possibility of understanding and forecasting biological  
31 responses to extreme weather.

32  
33 **Main text:**

34 Extreme weather events have occurred with increasing severity and frequency in recent decades,  
35 a trend that has been linked to anthropogenic climate change and shifts in atmospheric  
36 circulation<sup>1</sup>. Human societies are vulnerable to disruption by weather phenomena that include  
37 hurricanes and heat waves, and these events add to and interact with other climate change  
38 effects<sup>2</sup>. Natural systems of plants and animals have been studied intensively from the  
39 perspective of shifting average climatic conditions<sup>3,4</sup>, but we know less about the impacts of  
40 either elevated variation or extreme events on wild organisms<sup>5,6</sup>. Here we take advantage of  
41 decades of data on 163 butterfly species across an elevational gradient in Northern California  
42 (Fig. 1a) to address knowledge gaps within the context of a severe, millennium-scale drought  
43 that impacted the region from 2011 to 2015<sup>7</sup>. Specifically, we asked the following: 1) does an

44 extraordinary, multi-year drought elicit a faunal response that is extreme relative to faunal  
45 behavior in previous dry years? 2) Are impacts on the fauna consistent or divergent across  
46 elevations? A theoretical expectation is that organisms living in more heterogeneous  
47 environments should be more resilient to extremes of temporal variation<sup>8</sup>. We predicted that  
48 butterflies at montane sites would be robust relative to populations at lower elevations in  
49 landscapes that are both less spatially variable and already impacted by a history of human  
50 activity. 3) Finally, we asked if population-level responses to drought are mediated by  
51 phenological shifts. Species that are able to begin activity earlier in the spring might reach  
52 higher population densities<sup>9</sup>, potentially offsetting detrimental drought effects. Another  
53 possibility is that ectotherms exposed to longer growing seasons could fall into a developmental  
54 trap by which extra generations fail because of insufficient time<sup>10</sup>.

55         Investigations of butterflies at our focal sites have reported that a majority of populations  
56 at the lowest elevations have been in decline since at least the mid-1990s<sup>11</sup>, which has been  
57 attributed to changes in land use and warming temperatures<sup>12</sup>. Populations at higher elevations,  
58 in contrast, have shown relatively less directional change over time, with the exception of a  
59 decline in more dispersive, disturbance-associated species that rely on demographic connections  
60 with lower-elevation source populations<sup>13</sup>. Previous analyses of abiotic effects, prior to the  
61 2011-2015 drought, have noted responses to weather that were heterogeneous and idiosyncratic  
62 among sites and species<sup>14,15</sup>. In contrast to the previously-documented heterogeneity in  
63 population response, we find here that the recent, extreme drought years resulted in a number of  
64 faunal responses that were consistent across sites and elevational subsets of sites (montane  
65 versus valley sites).

66

## 67 **Results**

68 A prolonged and consistent shift towards earlier spring flights can be seen in Fig. 1b. While the  
69 shift in phenology is evident across elevations, the dynamics of the flight window diverge later in  
70 the season: at higher elevations, the date of last flight shifted to an earlier time during the  
71 drought, while at lower elevations the last flight dates from 2011 to 2015 are closer to the long-  
72 term average (Fig. 1c). In other words, the total flight window expanded at lower elevations,  
73 while in the mountains the flight window shifted and compressed towards the start of the season,  
74 a change that is reflected in fewer overall flight days at higher sites (Fig. 1d).

75 Along with the recent reduction in the average number of days that butterflies were  
76 observed flying at higher elevations during the drought years, there have been fewer butterfly  
77 species observed per year at the same sites (Figs. 2a – 2e). In some cases, the millennium  
78 drought was associated with a discrete downturn (e.g., Figs. 2b and 2c), while at other montane  
79 sites the recent drought years contributed to ongoing, negative trends (Figs. 2d and 2e). A  
80 downward trend in species richness is less evident at the highest site (CP, Fig. 2a), which  
81 previous analyses have found to be receiving immigrants from lower elevations as populations  
82 shift upslope in warmer years<sup>13</sup>. In a dramatic reversal of fortunes, the lowest elevation sites  
83 during the millennium drought experienced some of their most productive years in nearly two  
84 decades, as reflected both in numbers of species (Figs. 2g – 2j) and numbers of individuals  
85 observed (Figs. 2l – 2o). Results shown in Fig. 2 are for simple richness (the number of species  
86 observed per year). We repeated the analyses using alpha diversity Hill numbers that down  
87 weight the importance of rare species (Fig. S1, S2), and found similar results for all sites except  
88 for GC, where a long-term decline in the number of species becomes evident when rare, or  
89 transient species have less influence.

90 Why did the low elevation sites apparently rebound during the drought years? Using the  
91 lowest sites (RC, WS, NS and SM) and a span of years starting just before the millennium  
92 drought, we discovered an effect of phenological plasticity. Specifically, species whose first  
93 flight shifted to an earlier day were the species that became more abundant ( $r = -0.50$ ,  $P < 0.001$ ;  
94 Fig. S3). Butterflies at the lowest elevations are almost entirely multivoltine, and an earlier start  
95 for those species led to an extension of the flight season (Fig. 1d), and an increase in abundance  
96 and richness (Fig. 2). To understand climatic drivers of phenology, at low and high elevations,  
97 we modeled the dates of first flight as a function of maximum and minimum temperatures,  
98 precipitation, and El Niño (ENSO) conditions. Models explained 60% of the inter-annual  
99 variation at low elevations ( $F_{6,138} = 35.17$ ,  $P < 0.001$ ), and 72% at the higher elevation sites  
100 ( $F_{6,138} = 59.68$ ,  $P < 0.001$ ) (Table S1). Minimum and maximum temperatures had negative  
101 effects on first flight dates (warmer temperatures lead to earlier flights), and the effect of the  
102 former was most noticeable at higher elevations (Figs. 3a and 3b). Precipitation, as reflected by  
103 local weather and ENSO conditions, had a delaying effect on phenology (positive  $\beta$  coefficients  
104 in Figs. 3c and 3d), which is expected as wetter conditions are associated with cooler, cloudy  
105 days and delayed spring emergence.

106 Models of species richness revealed even more pronounced variation in weather effects  
107 across elevations, including an increased importance of variation in minimum temperatures (Fig.  
108 3e), maximum temperatures (Fig. 3f), and precipitation at higher elevations (Fig. 3g) (see Table  
109 S2 for full details). The highest elevations are most negatively affected by dry years with  
110 warmer nighttime temperatures. While daily maximum temperatures have risen everywhere  
111 (Fig. 3j) and patterns of precipitation have fluctuated in concert across sites (Fig. 3k), minimum  
112 temperatures have risen most steeply at the mountain sites (Fig. 3i). Models of species richness

113 also included phenology (date of first flight) as an explanatory variable, and we found an overall  
114 negative association (Fig. 3h), such that earlier emergence is associated with elevated richness  
115 (consistent with the effect of phenology on abundance at low elevations; Fig. S3). However, the  
116 beneficial effects of earlier emergence at higher elevations might not be as consequential because  
117 of a lack of multivoltine species, or they may simply be outweighed by the negative effects of  
118 minimum temperatures. Negative effects of minimum temperatures at the higher elevation sites  
119 range from 0.48 fewer species seen for every degree Celsius of warming at WA, to 6.46 fewer  
120 species seen for every degree at DP (Table S3).

121

## 122 **Discussion**

123 In contrast to previous observations that extreme weather elicits species-specific responses<sup>16</sup>, the  
124 millennium California drought produced consistent responses across many sites that included  
125 advanced dates of first flight with elevation-specific changes in flight windows and species  
126 richness. The resilience exhibited by the lowest elevations is associated with phenological  
127 flexibility combined with multivoltine life histories and climatic associations that are less  
128 detrimental (in the context of current climatic trends) than biotic-abiotic associations at higher  
129 elevations. Many researchers have hypothesized an impending mismatch between trophic levels  
130 as a result of climate change<sup>17</sup>. The results from low elevation butterflies in California perhaps  
131 challenge that hypothesis, or at least suggest that a shift in phenology at the consumer trophic  
132 level need not always have negative consequences. In addition to having multiple generations  
133 each year, populations at the lowest elevations have access to agricultural lands. Although  
134 association with irrigation does not appear to predict population dynamics during the drought  
135 (Fig. S3), we cannot rule out the possibility that low elevation populations were buffered during

136 the drought by irrigated crops or agricultural margins. If true, a reliance on agriculture would be  
137 interesting in the light of a recent hypothesis that long-term declines in low elevations butterfly  
138 populations are associated with intensification of pesticide applications<sup>18</sup>. It is possible that the  
139 rebound of the drought years could be followed by a more severe decline following concentrated  
140 agriculture dependency and toxin exposure.

141         It has been known for some time that high latitude environments are warming faster than  
142 the rest of the planet. It is only recently that climatologists have become aware that higher  
143 elevations may also be experiencing a disproportionate share of warming<sup>19</sup>, which raises the  
144 issue of how cold-adapted, montane ecosystems will respond. Contrary to the expectation that  
145 mountains offer microclimatic refugia and preadapt species for climatic variation<sup>8,20</sup>, we found  
146 high elevation butterfly communities to be declining and especially sensitive to dry years with  
147 warmer minimum temperatures. Warmer and drier years are associated with lower productivity  
148 of mesic-adapted plant communities<sup>21</sup>, and shorter windows during which montane plants are  
149 optimal for nectar and herbivory<sup>22</sup>. We did not model snowfall because it is highly correlated  
150 with annual precipitation at our sites (see Methods), but reduced snowpack in dry, warm years  
151 would have additional negative effects including higher overwinter mortality for life history  
152 stages that typically spend the winter under a blanket of snow<sup>23</sup>. The daily temperature range  
153 (the difference between maximum and minimum temperatures) has been shrinking around the  
154 globe<sup>24</sup>, but the ecological consequences of this thermal homogenization are poorly understood  
155 and not yet incorporated into theoretical expectations of global change biology<sup>25</sup>. The results  
156 reported here suggest that we have much yet to learn about organismal responses to extreme  
157 weather at low and high elevations, but that powerful and simple models predicting faunal  
158 dynamics are possible for ectotherms even in the face of unprecedented climatic variation.

159

## 160 **Methods**

161 **Butterfly data.** Ten study sites (Fig. 1a) were visited biweekly (every two weeks) by a one of us  
162 (AMS) for between 45 and 29 years, depending on the site, and only during good “butterfly  
163 weather” when conditions were suitable for insect flight (nearly year round at low elevations,  
164 and during a more narrow period at higher elevations). At each site, a fixed route was walked  
165 and the presence and absence of all butterfly species noted. Maps of survey routes and site-  
166 specific details, as well as publically-archived data can be found at <http://butterfly.ucdavis.edu/>.

167 For most analyses, we restricted data to a common set of years, from 1988 to 2016, for  
168 which we have data from all sites (the plots in Fig. 1 that go back to 1985 are exception, and do  
169 not include all sites in the first few years). Plots and analyses (described below) primarily  
170 involve species richness or phenological data, specifically dates of first flight (DFF) or dates of  
171 last flight (DLF). The later two variables (DFF and DLF) involved filtering to avoid biases  
172 associated with variation in the intensity or timing of site visits. Specifically, DFF values were  
173 only used if they were preceded by an absence; in other words, there must be a negative  
174 observation before a positive observation is taken as a DFF record. Similarly, DLF values were  
175 not used if they were not followed by an absence; so any species observed on the last visit to a  
176 site in a particular year did not have a record of DLF for that year. If a species was only  
177 observed on a single day in a particular year, then that date was used as a DFF (and only if  
178 preceded by an absence) but not as a DLF, in order to not use the same data point twice.

179 For a subset of years and sites, absolute counts of individual butterflies (by species) were  
180 taken in addition to the presence/absence data; this was done at the 5 lowest elevation sites  
181 starting in 1999. These data are used here to investigate the dynamics of the low elevation



182 butterflies during the drought years, specifically the relationship between phenological shifts,  
183 changing abundance and dependence on irrigation. For the latter (dependence on irrigation), one  
184 of us (AMS) ranked species *a priori* (without knowing the results of analyses) based on natural  
185 history observations. Dependency on irrigated areas was categorized as follows: 1), butterfly  
186 species that are essentially independent of irrigation; 2), species that use irrigated, non-native  
187 hosts in some areas as well as native, non-irrigated hosts in other areas; 3), species that use  
188 irrigated, non-native hosts in at least one of multiple generations; and 4), species that are  
189 completely dependent on irrigated, non-native hosts.

190

191 **Weather variables.** Analyses included the following weather variables: maximum and  
192 minimum daily temperatures, total precipitation, and a sea surface temperature variable  
193 associated with regional conditions<sup>15</sup>. Following previous analyses<sup>13</sup>, maximum and minimum  
194 temperatures were averaged and precipitation was totaled from the start of September of the  
195 previous year through August of the current year. Previous fall through current summer is a  
196 useful climatological time period in a Mediterranean climate and captures precipitation and  
197 overwintering conditions that potentially affect butterflies through both direct effects on juvenile  
198 and adult stages, and indirect effects through host and nectar plants. Data were generated as  
199 monthly values using the PRISM system (Parameter-elevation Relationships on Independent  
200 Slopes Model, PRISM Climate Group; <http://prism.oregonstate.edu>) for latitude and longitude  
201 coordinates at the center of each survey route.

202 As a complement to the site-specific, PRISM-derived weather variables, we used an  
203 index of sea-surface temperature associated with the El Niño Southern Oscillation (ENSO).  
204 Specifically, we used the ONI (Oceanic Niño Index) values for December, January and February

205 (a single value is reported for those winter months; <http://cpc.ncep.noaa.gov>) from the winter  
206 preceding butterfly observations for a given year. Higher values of this index correspond to  
207 regionally warmer and wetter conditions. We also downloaded snowfall data from the Central  
208 Sierra Snow Lab located near our Donner Pass site (station number 428, <http://wcc.sc.egov.usda.gov/nwcc>), but preliminary investigations found that annual snowfall totals were highly  
209 correlated with annual precipitation totals. Correlation coefficients between snowfall and  
210 precipitation were between 0.80 and 0.88, and the inclusion of snowfall caused variance inflation  
211 factors from linear models (described below) to often exceed 10; thus snowfall was not included  
212 in final models. In contrast, correlations among other weather variables (maximum  
213 temperatures, minimum temperatures, precipitation, and ENSO values) were generally lower:  
214 across sites and weather variables, the mean of the absolute value of correlation coefficients was  
215 0.31 (standard deviation = 0.23).  
216

217 Weather variables that were included in models were *z*-standardized within sites to be in  
218 units of standard deviations. This allows variables from sites with different average conditions  
219 (e.g., mountain and valley sites) to be readily compared and, more important, it allows for slopes  
220 from multiple regression models to be compared among weather variables that are themselves  
221 measured on different scales (as is the case with precipitation and temperature).  
222

223 **Analyses.** Statistical investigations involved two phases. First, we used plots of *z*-standardized  
224 data to visualize patterns in phenology (DFF and DLF) and flight days; the latter variable, the  
225 number of days flying, was expressed as the fraction of days that a species is observed divided  
226 by the number of visits to a site per year (this has been referred to as “day positives” in other  
227 publications using these data<sup>15</sup>). DFF, DLF, and flight days were *z*-standardized within species

228 at individual sites and then averaged across species to facilitate comparisons of patterns across  
229 sites and years. We also used plots of species richness to explore faunal changes over time at  
230 each site. Plots of richness were accompanied by splines (with 5 degrees of freedom) and  
231 predicted values from random forest analyses<sup>26</sup>, which both allow for visualization of non-linear  
232 relationships. The spline analysis has the advantage of producing smoothed relationships  
233 (between richness and years), while the random forest analysis, performed with the  
234 randomForest<sup>27</sup> package in R<sup>28</sup>, has the complementary advantage of being able to incorporate  
235 covariates (in this case the number of visits per year) as well as the advantage of making no  
236 assumptions about the shape of the relationship (between richness and years, while controlling  
237 for sampling effort). Patterns in species richness over time were also explored using diversity  
238 indices and Hill numbers that weight rare and common species differently (at different levels of  
239  $q$ , which determines the sensitivity of the analysis to rare species)<sup>29-31</sup>, using the vegetarian  
240 (v1.2) package<sup>32</sup> in R<sup>28</sup>. In addition, we used the combination of spline and random forest  
241 analyses to investigate changes in abundance (numbers of individuals observed per year) at the  
242 low elevation sites where abundance data was available. As with other variables, abundance  
243 values were  $z$ -standardized within species and sites, and  $z$ -scores were averaged across species.

244 Following the visualization phase of investigation, we developed simple linear models  
245 that were focused on prediction of dates of first flight (DFF) and species richness. Independent  
246 variables for both sets of models included average daily minimum temperatures, average daily  
247 maximum temperatures, total precipitation, ENSO (ONI sea surface temperatures), sampling  
248 effort (number of visits), and year. Models of species richness included date of first flight as an  
249 additional variable because we were interested in the possibility that the timing of species  
250 emergence affects butterfly populations and consequently observed species richness. These

251 models (for both DFF and richness) were estimated for each site individually and for high and  
252 low sites as groups of sites (5 sites in each model). Additional model complexities were  
253 explored that included interactions between weather variables, time lags (effects of previous  
254 years on current year dynamics) and cumulative effects (sliding windows of averaged  
255 precipitation values). Interactions were rare, but we report interactions between weather  
256 variables that were significant (at  $P < 0.05$ ). Lagged and cumulative weather variables did not  
257 add to the explanatory power of models and the individual lagged and cumulative effects were  
258 rarely significant and not discussed further.

259 As we have found elsewhere for analyses of phenology and richness with these data<sup>11,33</sup>,  
260 linear models satisfied assumptions of normality and homogeneity of variance. To address  
261 potential collinearity among predictor variables, variance inflation factors were investigated and  
262 found generally to be between 0 and 5, and in a few cases between 5 and 10. For instances  
263 where inflation factors approached 10, quality control was conducted by including and excluding  
264 correlated variables to verify that estimated  $\beta$  coefficients were not affected. Linear models were  
265 also used to test the hypothesis that phenological shifts at low elevations have demographic  
266 consequences for individual species. For each species at the lowest sites (SM, WS, NS, and RC),  
267 we separately regressed dates of first flight against years, and annual abundance against years.  
268 Slopes from those regressions were then compared using correlation to ask if species that shifted  
269 to an earlier flight (negative slopes for DFF versus years) were also species that become more  
270 abundant (positive slopes of abundance versus years). This was done for the years 2008 – 2016  
271 to capture the transition into the millennium drought years, and only included species that were  
272 present in at least 6 of those years. As with other analyses, linear models were performed and  
273 assumptions investigated using  $R^{28}$ .

274

274 **References**

- 275 1. N. S. Diffenbaugh, D. L. Swain, D. Touma, *Proc. Natl. Acad. Sci. USA* **112**, 3931-3936 (2015).
- 276 2. P. K. Thornton, P. J. Ericksen, M. Herrero, A. J. Challinor, *Global Change Biol.* **20**, 3313-3328  
277 (2014).
- 278 3. C. Parmesan, *Annu. Rev. Ecol. Evol. Syst.* **37**, 637-669 (2006).
- 279 4. B. Martay *et al.*, *Ecography* **40**, 1139-1151 (2017).
- 280 5. B. Helmuth *et al.*, *Climate Change Responses* **1**, 6 (2014).
- 281 6. S. F. Matter, J. Roland, *Ecosphere* **8**, (2017).
- 282 7. D. Griffin, K. J. Anchukaitis, *Geophys. Res. Lett.* **41**, 9017-9023 (2014).
- 283 8. C. P. Nadeau, M. C. Urban, J. R. Bridle, *Trends Ecol. Evol.* **32**, 786-800 (2017).
- 284 9. J. R. Forrest, *Current Opinion in Insect Science* **17**, 49-54 (2016).
- 285 10. H. Van Dyck, D. Bonte, R. Puls, K. Gotthard, D. Maes, *Oikos* **124**, 54-61 (2015).
- 286 11. M. L. Forister, J. P. Jahner, K. L. Casner, J. S. Wilson, A. M. Shapiro, *Ecology* **92**, 2222-2235  
287 (2011).
- 288 12. K. L. Casner *et al.*, *Conservation Biol.* **28**, 773-782 (2014).
- 289 13. M. L. Forister *et al.*, *Proc. Natl. Acad. Sci. USA* **107**, 2088-2092 (Feb, 2010).
- 290 14. C. C. Nice, M. L. Forister, Z. Gompert, J. A. Fordyce, A. M. Shapiro, *Ecology* **95**, 2155-2168  
291 (2014).
- 292 15. N. Pardikes, A. M. Shapiro, L. A. Dyer, M. L. Forister, *Ecology* **96**, 2891-2901 (2015).
- 293 16. G. Palmer *et al.*, *Phil. Trans. R. Soc. B* **372**, 20160144 (2017).
- 294 17. L. H. Yang, V. H. W. Rudolf, *Ecol. Lett.* **13**, 1-10 (Jan, 2010).
- 295 18. M. L. Forister *et al.*, *Biol. Lett.* **12**, 20160475 (2016).
- 296 19. Mountain Research Initiative EDW Working Group, *Nature climate change* **5**, 424-430 (2015).

- 297 20. C. Daly, D. R. Conklin, M. H. Unsworth, *International journal of climatology* **30**, 1857-1864  
298 (2010).
- 299 21. M. Gottfried *et al.*, *Nature climate change* **2**, 111-115 (2012).
- 300 22. N. Pettorelli, F. Pelletier, A. v. Hardenberg, M. Festa-Bianchet, S. D. Côté, *Ecology* **88**, 381-390  
301 (2007).
- 302 23. C. M. Williams, H. A. Henry, B. J. Sinclair, *Biological Reviews* **90**, 214-235 (2015).
- 303 24. R. S. Vose, D. R. Easterling, B. Gleason, *Geophys. Res. Lett.* **32**, (2005).
- 304 25. C. J. Speights, J. P. Harmon, B. T. Barton, *Current Opinion in Insect Science* **23**, 1-6 (2017).
- 305 26. L. Breiman, *Machine learning* **45**, 5-32 (2001).
- 306 27. A. Liaw, M. Wiener, *R news* **2**, 18-22 (2002).
- 307 28. RCoreTeam, *R: a language and environment for statistical computing*. (R Foundation for  
308 Statistical Compu, Vienna <http://www.R-project.org/>, 2013).
- 309 29. M. O. Hill, *Ecology* **54**, 427-432 (1973).
- 310 30. L. Jost, *Oikos* **113**, 363-375 (2006).
- 311 31. L. Jost, *Ecology* **88**, 2427-2439 (2007).
- 312 32. N. Charney, S. Record, *R Package Vegetarian version 1.2*, (2009).
- 313 33. M. L. Forister, A. M. Shapiro, *Global Change Biol.* **9**, 1130-1135 (Jul, 2003).

314

### 315 **Acknowledgements**

316 Research was funded by the National Science Foundation (DEB-1638773 to CCN, DEB-  
317 1638922 to JAF, and DEB-1638793 to MLF), and MLF was supported by a Trevor James  
318 McMinn professorship.

319

320 **Author contributions**

321 A.M.S. designed and carried out data collection. J.H.T. and D.P.W. managed data entry and  
322 curation. M.L.F., J.A.F. and C.C.N. analyzed the data. All authors contributed to writing.

323

324 **Additional information**

325 Supplementary information is available in the online version of the paper.

326

327 **Competing financial interests**

328 The authors declare no competing financial interests.

329

329

## 330 **Figure legends**

331 **Figure 1.** (a) Elevational profile of Northern California (left) and map of the same area (on the  
332 right) with ten study sites indicated on both; site names as follows, from west to east: Suisun  
333 Marsh (SM), Gates Canyon (GC), West Sacramento (WS), North Sacramento (NS), Rancho  
334 Cordova (RC), Washington (WA), Lang Crossing (LC), Donner Pass (DP), Castle Peak (CP) and  
335 Sierra Valley (SV). (b) Average dates of first flight and (c) last flight across species at each  
336 location and year. (d) Average flight days, which are the average fraction of days individual  
337 species are observed per year. In panels b, c, and d, color coding for individual lines  
338 corresponds to sites as in panel a, and the data are shown as z-standardized values. Grey  
339 rectangles in panels b, c, and d, indicate the major drought years from late 2011 into 2015.

340

341 **Figure 2.** Species richness (a through j) for all sites, and abundance (k through o) for low  
342 elevation sites (abundance data was only collected at the low sites). Two letter site names and  
343 colors follow Fig. 1A. In all panels, patterns are visualized with both a spline fit with five  
344 degrees of freedom (thin black line) and predicted values from random forest analysis (thick gray  
345 line) incorporating variation in sampling effort. In panels k through o, values plotted are z-  
346 standardized values of total abundance (number of individuals) per year averaged across species.

347

348 **Figure 3.** Results from a model of phenology (a through d) and a model of species richness (e  
349 through h), as well as plots of weather variables through time (i through l). In the model results  
350 (a through h), the values shown are  $\beta$  coefficients (with standard errors) that summarize the  
351 effect of a particular weather variable (while controlling for other variables) on either phenology  
352 or richness for each site. Trend lines are only shown in plots where the effect of a particular



353 weather variable changes with elevation (\*  $P < 0.05$ ; \*\*  $P < 0.01$ ; \*\*\*  $P < 0.001$ ; see Table S4  
354 for additional details). In panels **i** through **k**, weather patterns are visualized using splines with  
355 five degrees of freedom; panel **l** is the El Niño index (ONI) for each year. Weather variables are  
356 shown as  $z$ -standardized values in panels **i** through **k**, and site specific colors in all plots are the  
357 same as in Fig. 1a.

358

359

360

Fig. 1

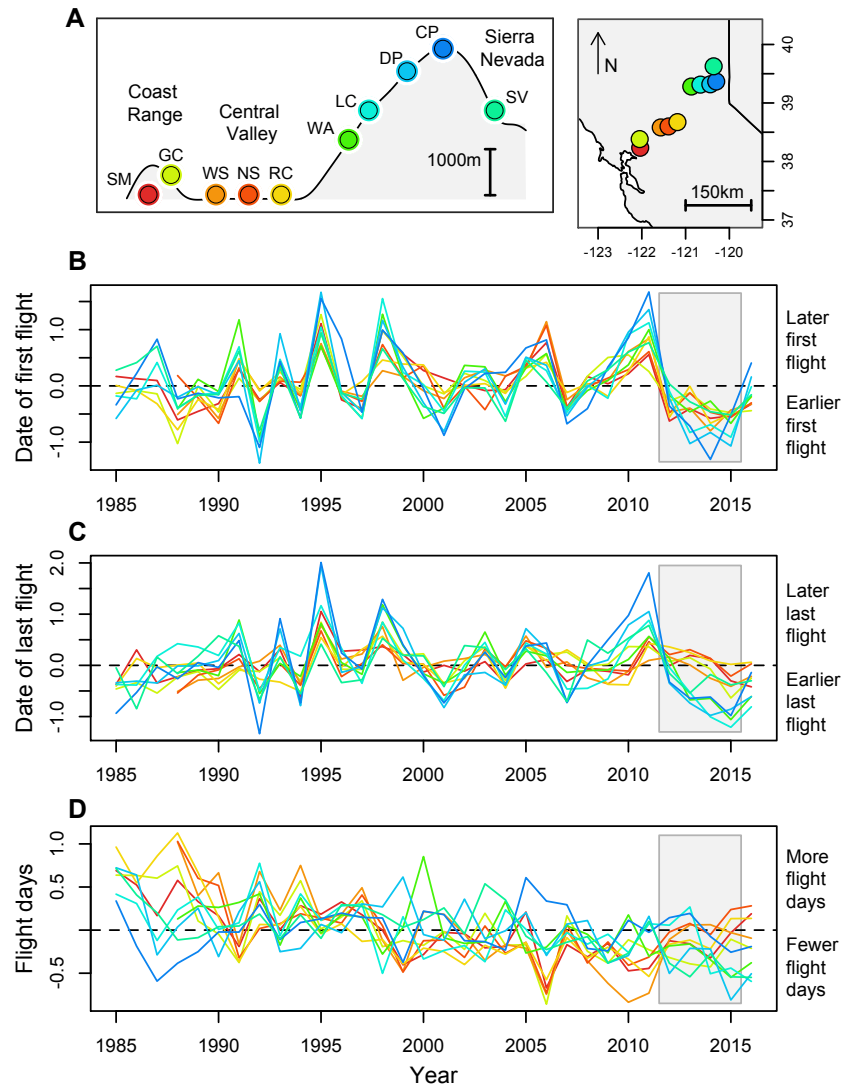

383

Fig. 2

384

385

386

387

388

389

390

391

392

393

394

395

396

397

398

399

400

401

402

403

404

405

406

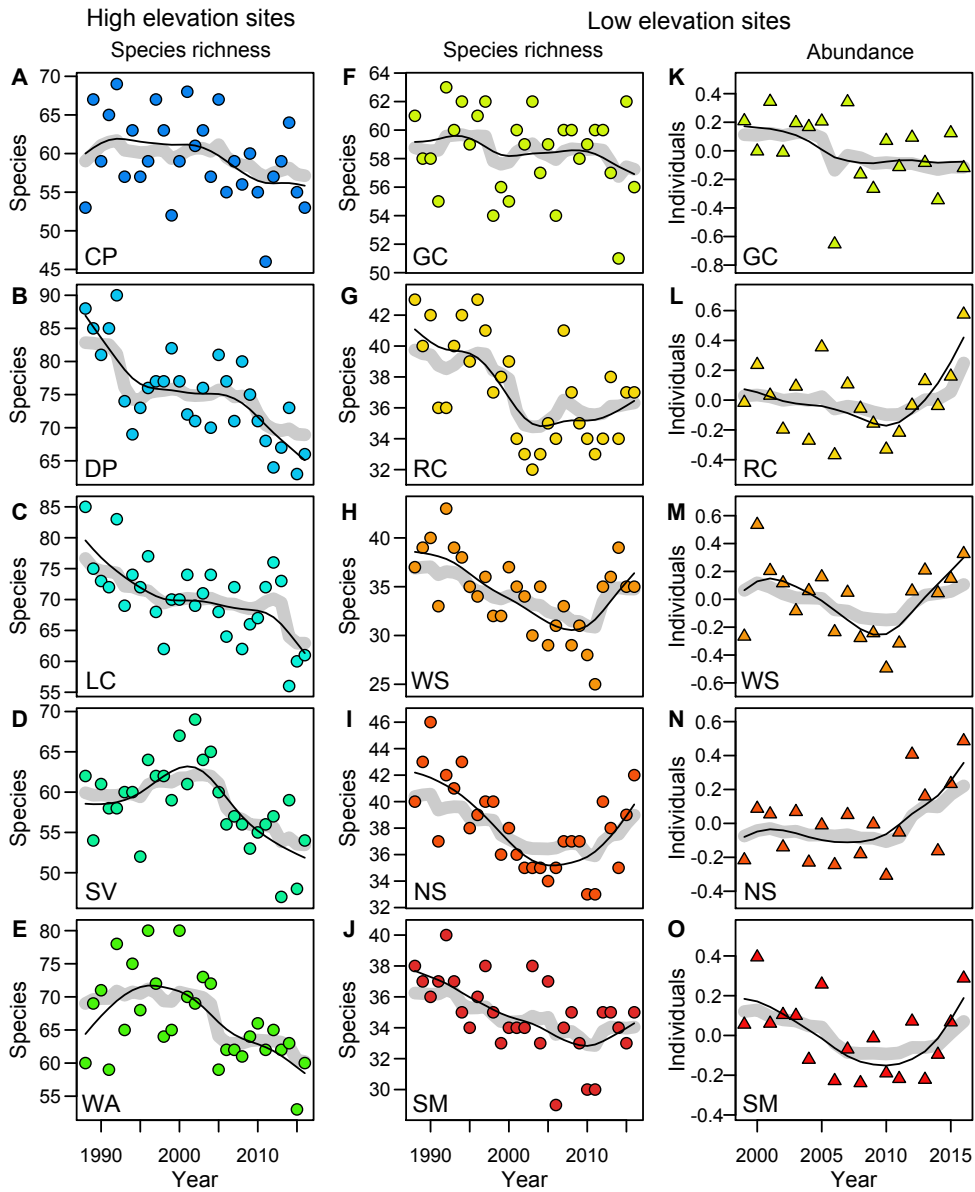

Fig. 3

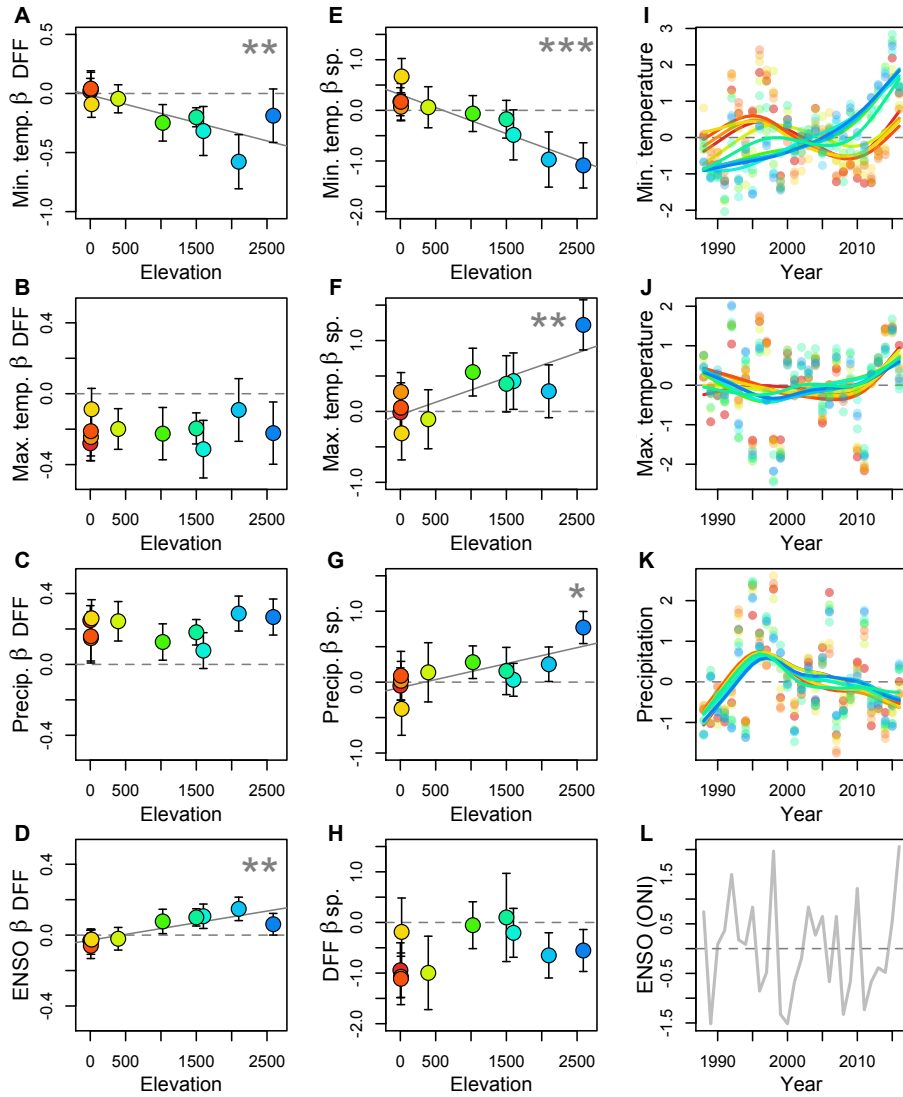

Source: https://www.biorxiv.org/content/10.1101/242560v1.full.pdf
